# Supplementary material
Source: Research Square preprint supplement (doi:10.21203/rs.3.rs-8912240/v1)
Supplement: Supplementary file 1 [file 246377752c5a9bf4ab4c52b4.docx]

**Additional file 2 Significance levels for the organizational initiatives across divisions**

|  | **Grupp 1** | **Grupp 2** | **Median grupp 1** | **Median grupp 2** | **M-W p-value** | **M-W p-value adj*** | **Chi2 p-value** | **Chi2 p-value adj*** |
| --- | --- | --- | --- | --- | --- | --- | --- | --- |
|  |  | |  |  |  |  |  |  |
| **Care process work** | 1 Total | 2 PHC | 3 | 3 | 0,7168 | 1 | 0,8129 | 1 |
| 1 Total | 3 MHCS | 3 | 1,5 | 0,0018 | 0,0267 | 0,0233 | 0,3495 |
| 1 Total | 4 GASE | 3 | 3 | 0,2808 | 1 | 0,1464 | 1 |
| 1 Total | 5 HA | 3 | 3 | 0,6914 | 1 | 0,8877 | 1 |
| 1 Total | 6 RD | 3 | 3 | 0,4576 | 1 | 0,3002 | 1 |
| 2 PHC | 3 MHCS | 3 | 1,5 | 0,0012 | 0,0184 | 0,0129 | 0,1935 |
| 2 PHC | 4 GASE | 3 | 3 | 0,3145 | 1 | 0,0657 | 0,9855 |
| 2 PHC | 5 HA | 3 | 3 | 0,8263 | 1 | 0,7412 | 1 |
| 2 PHC | 6 RD | 3 | 3 | 0,5845 | 1 | 0,1398 | 1 |
| 3 MHCS | 4 GASE | 1,5 | 3 | 0,0046 | 0,0692 | 0,0156 | 0,234 |
| 3 MHCS | 5 HA | 1,5 | 3 | 0,021 | 0,3147 | 0,1302 | 1 |
| 3 MHCS | 6 RD | 1,5 | 3 | 0,01 | 0,1499 | 0,0213 | 0,3195 |
| 4 GASE | 5 HA | 3 | 3 | 0,7977 | 1 | 0,8501 | 1 |
| 4 GASE | 6 RD | 3 | 3 | 1 | 1 | 0,3057 | 1 |
| 5 HA | 6 RD | 3 | 3 | 0,9206 | 1 | 1 | 1 |
|  |  | |  |  |  |  |  |  |
| **Digitalization** | 1 Total | 2 PHC | 3 | 4 | 0,9095 | 1 | 0,9604 | 1 |
| 1 Total | 3 MHCS | 3 | 2 | 0,4725 | 1 | 0,7762 | 1 |
| 1 Total | 4 GASE | 3 | 2 | 0,9962 | 1 | 0,4319 | 1 |
| 1 Total | 5 HA | 3 | 4 | 0,4628 | 1 | 0,1973 | 1 |
| 1 Total | 6 RD | 3 | 3 | 0,4657 | 1 | 0,0274 | 0,411 |
| 2 PHC | 3 MHCS | 4 | 2 | 0,526 | 1 | 0,7332 | 1 |
| 2 PHC | 4 GASE | 4 | 2 | 0,9285 | 1 | 0,3385 | 1 |
| 2 PHC | 5 HA | 4 | 4 | 0,4609 | 1 | 0,1506 | 1 |
| 2 PHC | 6 RD | 4 | 3 | 0,4638 | 1 | 0,0134 | 0,201 |
| 3 MHCS | 4 GASE | 2 | 2 | 0,6633 | 1 | 1 | 1 |
| 3 MHCS | 5 HA | 2 | 4 | 0,2837 | 1 | 0,0763 | 1 |
| 3 MHCS | 6 RD | 2 | 3 | 0,2824 | 1 | 0,037 | 0,555 |
| 4 GASE | 5 HA | 2 | 4 | 0,5165 | 1 | 0,0789 | 1 |
| 4 GASE | 6 RD | 2 | 3 | 0,3966 | 1 | 0,0649 | 0,9735 |
| 5 HA | 6 RD | 4 | 3 | 1 | 1 | 0,5238 | 1 |
|  |  | | |  |  |  |  |  |
| **Cross-organizational leadership days** | 1 Total | 2 PHC | 2,5 | 2 | 0,6516 | 1 | 0,9653 | 1 |
| 1 Total | 3 MHCS | 2,5 | 4 | 0,6592 | 1 | 0,3194 | 1 |
| 1 Total | 4 GASE | 2,5 | 2 | 0,8974 | 1 | 0,5622 | 1 |
| 1 Total | 5 HA | 2,5 | 4 | 0,5933 | 1 | 0,7465 | 1 |
| 1 Total | 6 RD | 2,5 | 3 | 0,584 | 1 | 0,0003 | 0,0045 |
| 2 PHC | 3 MHCS | 2 | 4 | 0,518 | 1 | 0,2476 | 1 |
| 2 PHC | 4 GASE | 2 | 2 | 0,8103 | 1 | 0,6177 | 1 |
| 2 PHC | 5 HA | 2 | 4 | 0,471 | 1 | 0,5478 | 1 |
| 2 PHC | 6 RD | 2 | 3 | 0,4247 | 1 | 0,0002 | 0,003 |
| 3 MHCS | 4 GASE | 4 | 2 | 1 | 1 | 0,2892 | 1 |
| 3 MHCS | 5 HA | 4 | 4 | 0,7216 | 1 | 0,8322 | 1 |
| 3 MHCS | 6 RD | 4 | 3 | 0,5854 | 1 | 0,0003 | 0,0045 |
| 4 GASE | 5 HA | 2 | 4 | 0,8981 | 1 | 1 | 1 |
| 4 GASE | 6 RD | 2 | 3 | 0,7612 | 1 | 0,002 | 0,03 |
| 5 HA | 6 RD | 4 | 3 | 0,6032 | 1 | 0,0079 | 0,1185 |
|  |  | | |  |  |  |  |  |
| **Divisional leadershp days** | 1 Total | 2 PHC | 2 | 2 | 0,7465 | 1 | 0,9967 | 1 |
| 1 Total | 3 MHCS | 2 | 2 | 0,7518 | 1 | 0,2639 | 1 |
| 1 Total | 4 GASE | 2 | 2 | 0,9407 | 1 | 0,6053 | 1 |
| 1 Total | 5 HA | 2 | 2 | 0,4532 | 1 | 0,6703 | 1 |
| 1 Total | 6 RD | 2 | 3 | 0,0575 | 0,8627 | 0,0007 | 0,0105 |
| 2 PHC | 3 MHCS | 2 | 2 | 0,6672 | 1 | 0,2647 | 1 |
| 2 PHC | 4 GASE | 2 | 2 | 0,9524 | 1 | 0,7332 | 1 |
| 2 PHC | 5 HA | 2 | 2 | 0,5271 | 1 | 0,7006 | 1 |
| 2 PHC | 6 RD | 2 | 3 | 0,0561 | 0,842 | 0,0008 | 0,012 |
| 3 MHCS | 4 GASE | 2 | 2 | 1 | 1 | 0,4544 | 1 |
| 3 MHCS | 5 HA | 2 | 2 | 0,7226 | 1 | 0,2541 | 1 |
| 3 MHCS | 6 RD | 2 | 3 | 0,5718 | 1 | 0,0003 | 0,0045 |
| 4 GASE | 5 HA | 2 | 2 | 0,6718 | 1 | 1 | 1 |
| 4 GASE | 6 RD | 2 | 3 | 0,0709 | 1 | 0,001 | 0,015 |
| 5 HA | 6 RD | 2 | 3 | 0,0079 | 0,119 | 0,0079 | 0,1185 |
|  |  | | |  |  |  |  |  |
| **Leadership development programme** | 1 Total | 2 PHC | 2 | 2 | 0,332 | 1 | 0,7922 | 1 |
| 1 Total | 3 MHCS | 2 | 1,5 | 0,4559 | 1 | 0,2048 | 1 |
| 1 Total | 4 GASE | 2 | 4 | 0,0042 | 0,0625 | 0,0179 | 0,2685 |
| 1 Total | 5 HA | 2 | 2 | 0,9512 | 1 | 0,7249 | 1 |
| 1 Total | 6 RD | 2 | 3 | 0,1091 | 1 | 0,0866 | 1 |
| 2 PHC | 3 MHCS | 2 | 1,5 | 0,7131 | 1 | 0,1196 | 1 |
| 2 PHC | 4 GASE | 2 | 4 | 0,0011 | 0,0164 | 0,0025 | 0,0375 |
| 2 PHC | 5 HA | 2 | 2 | 0,7355 | 1 | 0,5244 | 1 |
| 2 PHC | 6 RD | 2 | 3 | 0,035 | 0,5251 | 0,0466 | 0,699 |
| 3 MHCS | 4 GASE | 1,5 | 4 | 0,0161 | 0,241 | 0,053 | 0,795 |
| 3 MHCS | 5 HA | 1,5 | 2 | 0,5581 | 1 | 0,1525 | 1 |
| 3 MHCS | 6 RD | 1,5 | 3 | 0,2238 | 1 | 0,0343 | 0,5145 |
| 4 GASE | 5 HA | 4 | 2 | 0,1668 | 1 | 0,5265 | 1 |
| 4 GASE | 6 RD | 4 | 3 | 0,3277 | 1 | 0,0909 | 1 |
| 5 HA | 6 RD | 2 | 3 | 0,3175 | 1 | 0,127 | 1 |
|  |  | | |  |  |  |  |  |
| **Competence planning system** | 1 Total | 2 PHC | 3 | 3 | 0,5956 | 1 | 0,8456 | 1 |
| 1 Total | 3 MHCS | 3 | 3 | 0,6343 | 1 | 1 | 1 |
| 1 Total | 4 GASE | 3 | 3 | 0,2028 | 1 | 0,3943 | 1 |
| 1 Total | 5 HA | 3 | 2 | 0,0233 | 0,349 | 0,0775 | 1 |
| 1 Total | 6 RD | 3 | 3 | 0,3901 | 1 | 0,5865 | 1 |
| 2 PHC | 3 MHCS | 3 | 3 | 0,8347 | 1 | 0,9074 | 1 |
| 2 PHC | 4 GASE | 3 | 3 | 0,1358 | 1 | 0,1786 | 1 |
| 2 PHC | 5 HA | 3 | 2 | 0,0135 | 0,2029 | 0,0333 | 0,4995 |
| 2 PHC | 6 RD | 3 | 3 | 0,5275 | 1 | 0,4658 | 1 |
| 3 MHCS | 4 GASE | 3 | 3 | 0,1447 | 1 | 0,7771 | 1 |
| 3 MHCS | 5 HA | 3 | 2 | 0,034 | 0,5095 | 0,366 | 1 |
| 3 MHCS | 6 RD | 3 | 3 | 0,7656 | 1 | 0,8508 | 1 |
| 4 GASE | 5 HA | 3 | 2 | 0,1838 | 1 | 0,7273 | 1 |
| 4 GASE | 6 RD | 3 | 3 | 0,1064 | 1 | 0,3706 | 1 |
| 5 HA | 6 RD | 2 | 3 | 0,0794 | 1 | 0,3651 | 1 |
|  |  |  |  |  |  |  |  |  |
| **Intranet** | 1 Total | 2 PHC | 2 | 2 | 0,8752 | 1 | 0,9925 | 1 |
| 1 Total | 3 MHCS | 2 | 2 | 0,4103 | 1 | 0,7931 | 1 |
| 1 Total | 4 GASE | 2 | 2 | 0,8642 | 1 | 0,4903 | 1 |
| 1 Total | 5 HA | 2 | 4 | 0,3488 | 1 | 0,4834 | 1 |
| 1 Total | 6 RD | 2 | 3 | 0,5081 | 1 | 0,2745 | 1 |
| 2 PHC | 3 MHCS | 2 | 2 | 0,5102 | 1 | 0,6979 | 1 |
| 2 PHC | 4 GASE | 2 | 2 | 0,8216 | 1 | 0,5013 | 1 |
| 2 PHC | 5 HA | 2 | 4 | 0,3569 | 1 | 0,574 | 1 |
| 2 PHC | 6 RD | 2 | 3 | 0,517 | 1 | 0,3653 | 1 |
| 3 MHCS | 4 GASE | 2 | 2 | 0,4768 | 1 | 1 | 1 |
| 3 MHCS | 5 HA | 2 | 4 | 0,1489 | 1 | 0,0803 | 1 |
| 3 MHCS | 6 RD | 2 | 3 | 0,2048 | 1 | 0,1608 | 1 |
| 4 GASE | 5 HA | 2 | 4 | 0,544 | 1 | 0,1469 | 1 |
| 4 GASE | 6 RD | 2 | 3 | 0,6349 | 1 | 0,2657 | 1 |
| 5 HA | 6 RD | 4 | 3 | 0,9206 | 1 | 1 | 1 |
|  |  |  |  |  |  |  |  |  |
| **Helpdesk** | 1 Total | 2 PHC | 2 | 2 | 0,6194 | 1 | 0,9258 | 1 |
| 1 Total | 3 MHCS | 2 | 2 | 0,5024 | 1 | 0,3857 | 1 |
| 1 Total | 4 GASE | 2 | 2 | 0,7302 | 1 | 0,1038 | 1 |
| 1 Total | 5 HA | 2 | 2 | 0,449 | 1 | 0,6506 | 1 |
| 1 Total | 6 RD | 2 | 2 | 0,3191 | 1 | 0,414 | 1 |
| 2 PHC | 3 MHCS | 2 | 2 | 0,3422 | 1 | 0,1651 | 1 |
| 2 PHC | 4 GASE | 2 | 2 | 0,8349 | 1 | 0,0489 | 0,7335 |
| 2 PHC | 5 HA | 2 | 2 | 0,4714 | 1 | 0,5531 | 1 |
| 2 PHC | 6 RD | 2 | 2 | 0,1895 | 1 | 0,1832 | 1 |
| 3 MHCS | 4 GASE | 2 | 2 | 0,5401 | 1 | 0,3188 | 1 |
| 3 MHCS | 5 HA | 2 | 2 | 0,8172 | 1 | 0,5198 | 1 |
| 3 MHCS | 6 RD | 2 | 2 | 0,5834 | 1 | 1 | 1 |
| 4 GASE | 5 HA | 2 | 2 | 0,6449 | 1 | 0,6703 | 1 |
| 4 GASE | 6 RD | 2 | 2 | 0,3856 | 1 | 0,4206 | 1 |
| 5 HA | 6 RD | 2 | 2 | 1 | 1 | 1 | 1 |
|  |  | |  |  |  |  |  |  |
| **R&D Division** | 1 Total | 2 PHC | 3 | 4 | 0,1621 | 1 | 0,5007 | 1 |
| 1 Total | 3 MHCS | 3 | 2 | 0,0395 | 0,5929 | 0,0499 | 0,7485 |
| 1 Total | 4 GASE | 3 | 3 | 0,7739 | 1 | 0,1203 | 1 |
| 1 Total | 5 HA | 3 | 3 | 0,3563 | 1 | 0,5666 | 1 |
| 1 Total | 6 RD | 3 | 1 | 0,0054 | 0,0804 | 0,0126 | 0,189 |
| 2 PHC | 3 MHCS | 4 | 2 | 0,007 | 0,1044 | 0,0065 | 0,0975 |
| 2 PHC | 4 GASE | 4 | 3 | 0,6296 | 1 | 0,0875 | 1 |
| 2 PHC | 5 HA | 4 | 3 | 0,1597 | 1 | 0,1276 | 1 |
| 2 PHC | 6 RD | 4 | 1 | 0,0004 | 0,0056 | 0,0005 | 0,0075 |
| 3 MHCS | 4 GASE | 2 | 3 | 0,0383 | 0,5748 | 0,0014 | 0,021 |
| 3 MHCS | 5 HA | 2 | 3 | 0,5831 | 1 | 0,4046 | 1 |
| 3 MHCS | 6 RD | 2 | 1 | 0,3137 | 1 | 0,3973 | 1 |
| 4 GASE | 5 HA | 3 | 3 | 0,2228 | 1 | 0,5594 | 1 |
| 4 GASE | 6 RD | 3 | 1 | 0,0035 | 0,0524 | 0,021 | 0,315 |
| 5 HA | 6 RD | 3 | 1 | 0,2698 | 1 | 0,7143 | 1 |
|  |  | | |  |  |  |  |  |
| **Cross-organizational patient safety** | 1 Total | 2 PHC | 2 | 2 | 0,5889 | 1 | 0,7403 | 1 |
| 1 Total | 3 MHCS | 2 | 1,5 | 0,0433 | 0,649 | 0,29 | 1 |
| 1 Total | 4 GASE | 2 | 2 | 0,2773 | 1 | 0,8791 | 1 |
| 1 Total | 5 HA | 2 | 4 | 0,1911 | 1 | 0,1186 | 1 |
| 1 Total | 6 RD | 2 | 3 | 0,5272 | 1 | 0,0026 | 0,039 |
| 2 PHC | 3 MHCS | 2 | 1,5 | 0,0227 | 0,34 | 0,0847 | 1 |
| 2 PHC | 4 GASE | 2 | 2 | 0,1827 | 1 | 0,7521 | 1 |
| 2 PHC | 5 HA | 2 | 4 | 0,2751 | 1 | 0,0936 | 1 |
| 2 PHC | 6 RD | 2 | 3 | 0,5342 | 1 | 0,0006 | 0,009 |
| 3 MHCS | 4 GASE | 1,5 | 2 | 0,5588 | 1 | 0,7613 | 1 |
| 3 MHCS | 5 HA | 1,5 | 4 | 0,049 | 0,7343 | 0,0759 | 1 |
| 3 MHCS | 6 RD | 1,5 | 3 | 0,0573 | 0,8591 | 0,0343 | 0,5145 |
| 4 GASE | 5 HA | 2 | 4 | 0,1399 | 1 | 0,1568 | 1 |
| 4 GASE | 6 RD | 2 | 3 | 0,1748 | 1 | 0,008 | 0,12 |
| 5 HA | 6 RD | 4 | 3 | 0,0476 | 0,7143 | 0,0159 | 0,2385 |

| *M-W=Mann-Whitney exact test |
| --- |
| Chi2=Fisher's exact test |
| adj=Bonferroni adjustment for multiple testing (15 tests per item) |
|  |
| *Red cells indicate statistically significant results (p < 0.05). |
