# Supplementary material
Source: Research Square preprint supplement (doi:10.21203/rs.3.rs-8912240/v1)
Supplement: Supplementary file 2 [file 766ba99ba07210ae74e9307e.docx]

**Additional file 3 Polarity (PI), intensity (II) and uncertainty (UI) indices**

| **Org initiative** | **Tid** | **pi_phc** | **ii_phc** | **ui_phc** | **pi_mhcs** | **ii_mhcs** | **ui_mhcs** | **pi_gase** | **ii_gase** | **ui_gase** | **pi_ha** | **ii_ha** | **ui_ha** | **pi_rd** | **ii_rd** | **ui_rd** | **pi_total** | **ii_total** | **ui_total** |
| --- | --- | --- | --- | --- | --- | --- | --- | --- | --- | --- | --- | --- | --- | --- | --- | --- | --- | --- | --- |
| Care process | 2019 | 0,74 | 26 | 13 | 0,13 | 50 | 10 | 0,49 | 45 | 33 | 0,5 | 20 | 40 | 0 | 20 | 60 | 0,86 | 29 | 20 |
| Digitalization | 2019 | 0,8 | 23 | 8 | 0,67 | 30 | 0 | 0,79 | 33 | 0 | 0 | 0 | 40 | 0 | 20 | 60 | 0,82 | 24 | 11 |
| Cross-org days | 2019 | 0,62 | 23 | 11 | 0,79 | 22 | 0 | 0,67 | 40 | 0 | 0,49 | 33 | 0 | * | 0 | 100 | 0,88 | 16 | 21 |
| Division days | 2019 | 0,26 | 31 | 13 | 0,52 | 33 | 0 | 0,28 | 33 | 0 | 0 | 20 | 0 | * | 0 | 100 | 0,26 | 29 | 14 |
| Leader prgr | 2019 | 0,21 | 30 | 24 | 0,59 | 45 | 11 | 0,33 | 33 | 11 | 0,33 | 40 | 20 | 0 | 0 | 80 | 0,39 | 32 | 25 |
| Comp system | 2019 | 0,5 | 23 | 34 | 0,25 | 20 | 50 | 0,5 | 11 | 67 | 0 | 40 | 40 | 0 | 40 | 60 | 0,55 | 23 | 41 |
| Intranet | 2019 | 0,43 | 30 | 3 | 0,11 | 20 | 0 | 0,28 | 22 | 0 | 0,67 | 20 | 0 | 1 | 20 | 20 | 0,41 | 27 | 3 |
| Helpdesk | 2019 | 0,21 | 27 | 3 | 0,14 | 10 | 20 | 0,35 | 55 | 11 | 0,67 | 20 | 0 | 0,33 | 0 | 20 | 0,24 | 26 | 7 |
| R&D | 2019 | 0,29 | 31 | 20 | 0,43 | 40 | 0 | 0 | 22 | 67 | 0,5 | 40 | 40 | 0 | 60 | 20 | 0,55 | 33 | 24 |
| Patient safety | 2019 | 0,58 | 22 | 5 | 0,13 | 50 | 10 | 0,3 | 33 | 0 | 0,25 | 20 | 0 | 0 | 0 | 80 | 0,88 | 16 | 21 |
| Average |  | 0,46 | 26,6 | 13,4 | 0,38 | 32,0 | 10,1 | 0,40 | 32,7 | 18,9 | 0,34 | 25,3 | 18,0 | 0,17 | 16,0 | 60,0 | 0,58 | 25,5 | 18,7 |
